# Supplementary material for: Mesoporous Silica Nanoparticles Coated with Carboxymethyl Chitosan for 5-Fluorouracil Ocular Delivery: Characterization, In Vitro and In Vivo Studies
Source: MDPI journal article supplement (doi:10.3390/molecules28031260), 2023-01-27
Supplement: s1 [file s1]

# Mesoporous Silica Nanoparticles Coated with Carboxymethyl Chitosan for 5-Fluorouracil Ocular Delivery: Characterization, In Vitro and In Vivo Studies

Adel Ali Alhowyan <sup>1</sup>, Mohd Abul Kalam <sup>1,2</sup>, Muzaffar Iqbal <sup>3,4</sup>, Mohammad Raish <sup>1</sup>, Ahmed M. El-Toni <sup>5,6</sup>,  
Musaed Alkholief <sup>1,2</sup>, Aliyah A. Almomen <sup>2,3</sup> and Aws Alshamsan <sup>1,2,\*</sup>

<sup>1</sup> Department of Pharmaceutics, College of Pharmacy, King Saud University, Riyadh 11451, Saudi Arabia

<sup>2</sup> Nanobiotechnology Unit, College of Pharmacy, King Saud University, Riyadh 11451, Saudi Arabia

<sup>3</sup> Department of Pharmaceutical Chemistry, College of Pharmacy, King Saud University, Riyadh 11495, Saudi Arabia

<sup>4</sup> Central Lab, College of Pharmacy, King Saud University, Riyadh 11451, Saudi Arabia

<sup>5</sup> King Abdullah Institute for Nanotechnology, King Saud University, Riyadh 11495, Saudi Arabia

<sup>6</sup> Nanomaterials and Nanotechnology Department, Central Metallurgical Research and Development Institute (CMRDI), Helwan, Cairo 11865, Egypt

\* Correspondence: aalshamsan@ksu.edu.sa

**Table S1.** Grading system for ocular irritation test.

| Cornea                                                                                                                                                                                  |                        |           |
|-----------------------------------------------------------------------------------------------------------------------------------------------------------------------------------------|------------------------|-----------|
| Lesion                                                                                                                                                                                  |                        | Score     |
| <b>a. Opacity-Degree of density (area which is most dense is taken for reading)</b>                                                                                                     |                        |           |
| No ulceration or opacity                                                                                                                                                                |                        | 0         |
| Scattered or diffuse area – details of iris clearly visible                                                                                                                             |                        | 1         |
| Easily discernible translucent areas, details of iris slightly obscured                                                                                                                 |                        | 2         |
| Opalescent areas, no details of iris visible, size of pupil barely discernible                                                                                                          |                        | 3         |
| Opaque, iris invisible                                                                                                                                                                  |                        | 4         |
| <b>b. Area of cornea involved</b>                                                                                                                                                       |                        |           |
| One quarter (or less) but not zero                                                                                                                                                      |                        | 1         |
| Greater than one quarter but less than one half                                                                                                                                         |                        | 2         |
| Greater than one half but less than three quarters                                                                                                                                      |                        | 3         |
| Greater than three quarters up to whole area                                                                                                                                            |                        | 4         |
| <b>Score equals (a x b x 5):</b>                                                                                                                                                        | <b>Total maximum =</b> | <b>80</b> |
| Iris                                                                                                                                                                                    |                        |           |
| Lesion                                                                                                                                                                                  |                        | Score     |
| <b>a. Values</b>                                                                                                                                                                        |                        |           |
| Normal                                                                                                                                                                                  |                        | 0         |
| Folds above normal, congestion, swelling, circumcorneal injection (any one or all of these or combination of any thereof), iris still reacting to light (sluggish reaction is positive) |                        | 1         |
| No reaction to light, hemorrhage; gross destruction (any one/ all of these)                                                                                                             |                        | 2         |
| <b>Score equals (a x 5):</b>                                                                                                                                                            | <b>Total maximum =</b> | <b>10</b> |
| Conjunctiva                                                                                                                                                                             |                        |           |
| Lesion                                                                                                                                                                                  |                        | Score     |
| <b>a. Redness (refers to palpebral conjunctiva only)</b>                                                                                                                                |                        |           |
| Vessels normal                                                                                                                                                                          |                        | 0         |
| Vessels definitely injected above normal                                                                                                                                                |                        | 1         |
| More diffuse, deeper crimson red, individual vessels not easily discernible                                                                                                             |                        | 2         |
| Diffuse beefy red                                                                                                                                                                       |                        | 3         |
| <b>b. Chemosis</b>                                                                                                                                                                      |                        |           |
| No swelling                                                                                                                                                                             |                        | 0         |
| Any swelling above normal (includes nictitating membrane)                                                                                                                               |                        | 1         |

|                                                                                                              |                           |
|--------------------------------------------------------------------------------------------------------------|---------------------------|
| Obvious swelling with partial eversion of the lids                                                           | 2                         |
| Swelling with lids about half closed                                                                         | 3                         |
| Swelling with lids about half closed to completely closed                                                    | 4                         |
| <b>c. Discharge</b>                                                                                          |                           |
| No any discharge                                                                                             | 0                         |
| Any amount different from normal (does not include small amount observed in inner canthus of normal animals) | 1                         |
| Discharge with moistening of the lids and hairs just adjacent to the lids                                    | 2                         |
| Discharge with moistening of the lids and considerable area around the eye                                   | 3                         |
| <b>Score equals (a + b + c) x 2:</b>                                                                         | <b>Total maximum = 20</b> |

Note: The maximum total score is the sum of all scores obtained for the cornea, iris and conjunctiva. Scores of 0 are assigned for each parameter if the cornea, iris, or conjunctiva is normal.

**Table S2.** Classification of eye irritation scoring system.

| Classification of Irritation | Maximum Mean Total Score (MMTS) |
|------------------------------|---------------------------------|
| None                         | 0.0-0.5                         |
| Practically none             | 0.6-2.5                         |
| Minimally                    | 2.6-15.0                        |
| Mildly                       | 15.1-25.0                       |
| Moderately                   | 25.1-50.0                       |
| Severely                     | 50.1-80.0                       |
| Extremely                    | 80.1-100.0                      |
| Maximally                    | 100.1-110.0                     |

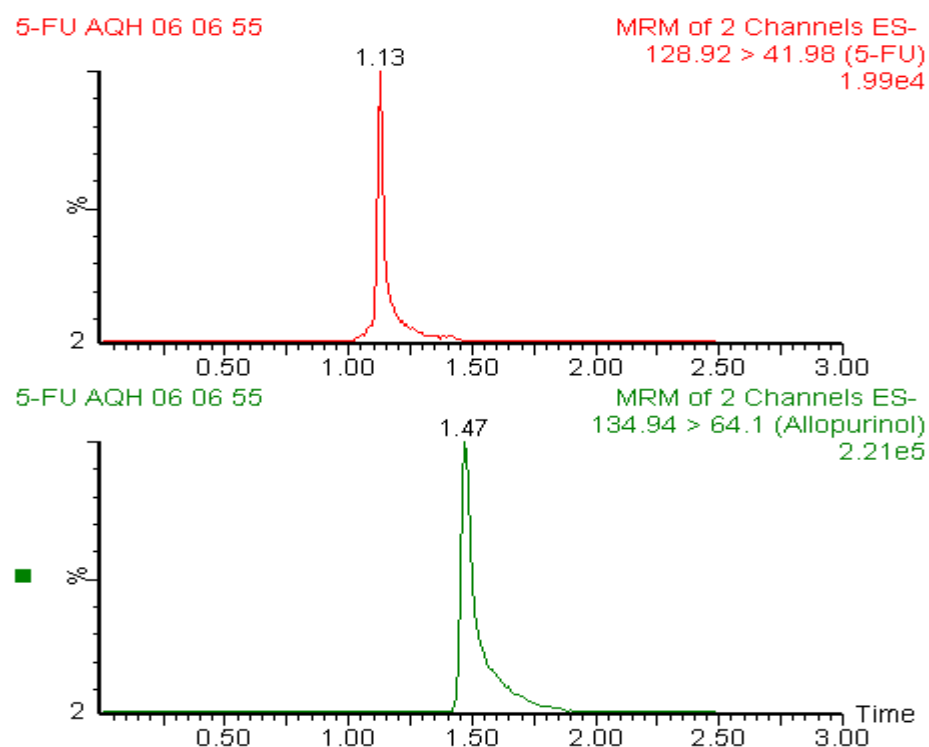

5-FU AQH 23 01 24

MRM of 3 Channels ES-  
128.92 > 41.98 (5-FU)  
296

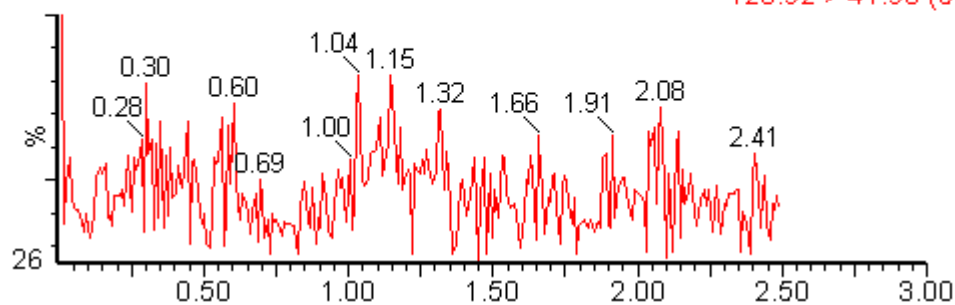

5-FU AQH 23 01 24

MRM of 3 Channels ES-  
134.94 > 64.1 (Allopurinol)  
737

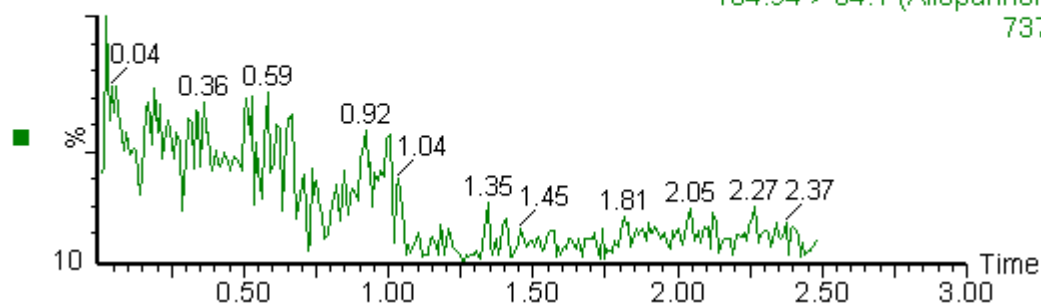

5-FU AQH 07 06 35

MRM of 2 Channels ES-  
128.92 > 41.98 (5-FU)  
1.02e6

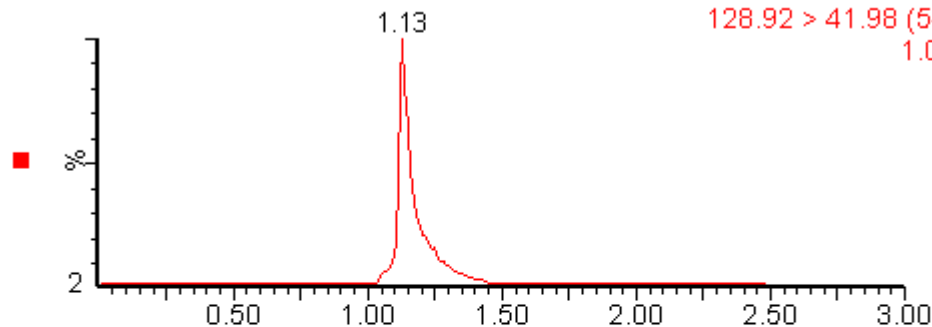

5-FU AQH 07 06 35

MRM of 2 Channels ES-  
134.94 > 64.1 (Allopurinol)  
2.31e5

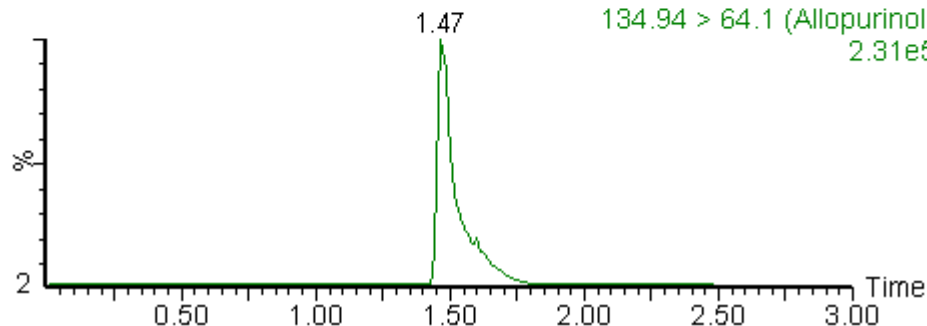

**Figure S1.** Typical chromatogram of LLOQ, blank aqueous humor, and representative extracted sample from ocular pK experiment.
